# Supplementary material for: Randomized clinical trial to evaluate the effect of fecal microbiota transplant for initial Clostridium difficile infection in intestinal microbiome
Source: PLoS One. 2017 Dec 20;12(12):e0189768. doi: 10.1371/journal.pone.0189768 (PMC5738078; doi:10.1371/journal.pone.0189768)
Supplement: S4 File — Information of typing and strains susceptibility. (XLSX) [file pone.0189768.s004.xlsx]

## Sheet: Hoja1
Day 0						MIC
SAMPLE	Tox A	Tox B	Tox bin	del tcdC		CIP	MOX	ERI	CLIN	VAN	MET	LIN	FDX	RIF	TET
E2	+	+	+	18		>128	64	>128	>128	4	2	4	0.015	>128	0.03
E3	+	+	+	18		>128	64	>128	>128	4	2	4	0.015	>128	0.03
E5	+	+	+	18		>128	64	>128	>128	4	2	4	0.015	>128	0.03
E10	+	+	neg	0		16	16	2	2	1	0.5	1	0.06	0.002	0.03
E12	+	+	+	18		>128	64	2	>128	4	2	4	0.015	>128	0.03
E14	+	+	+	18		64	64	>128	>128	4	2	1	0.015	>128	0.03
E15	+	+	+	18		>128	64	>128	>128	8	2	4	0.015	>128	0.03
Day 3						CMI
SAMPLE	Tox A	Tox B	Tox bin	tcdC		CIP	MOX	ERI	CLIN	VAN	MET	LIN	FDX	RIF	TET
E21	+	+	+	18		>128	64	>128	>128	4	2	4	0.015	>128	0.03
E23	+	+	+	18		64	64	>128	>128	4	2	4	0.015	>128	0.03
E28	+	+	neg	0		16	32	4	4	1	0.5	1	0.06	0.002	0.06
E32	+	+	+	18		64	64	>128	>128	4	2	1	0.015	>128	0.03
E33	+	+	+	18		>128	64	>128	>128	8	2	1	0.008	>128	0.03
